# Supplementary material
Source: MDPI journal article supplement (https://www.mdpi.com/2226-4310/9/10/591)
Supplement: s1 [file s1 › aerospace-1939622-supplementary.pdf]

# 1 Statistical study of MCC

## 1.1 General framework

Let  $\mathcal{T} = (T_n)_{0 \leq n \leq N-1}$  be a corpus of  $N$  texts we want to classify into  $K$  classes. We have at our disposal a classifier that associates to each text its predicted class  $k_n$ ,  $l_n$  denotes the true class of the text  $T_n$ .

Let  $\hat{C} = (\hat{c}_{i,j})_{0 \leq i,j \leq N-1}$  be the empirical confusion square matrix of size  $K$  defined by

$$\hat{c}_{i,j} = \sum_{n=0}^{N-1} X_n(i,j) \quad (1)$$

with

$$X_n(i,j) = \mathbb{1}_{k_n=i} \mathbb{1}_{l_n=j}, \quad (2)$$

and let  $\hat{P} = (\hat{p}_{i,j})$  be the proportion matrix defined by  $\hat{P} = \frac{1}{N} \hat{C}$ .

### Assumption 1

For all  $(i,j) \in \{1, \dots, K\}^2$ , the elements of the sequence  $(X_n(i,j))_{0 \leq n \leq N-1}$  are i.i.d random variables of the same law as  $X(i,j)$  with:

$$\mathbb{P}(X_n(i,j) = 1) = 1 - \mathbb{P}(X_n(i,j) = 0) = p_{i,j}. \quad (3)$$

**Remark 1.**  $p_{i,j}$  represents the probability that a text categorized in the  $i$ -class belongs to the  $j$ -class. By the strong law of large number we have

$$\hat{p}_{i,j} \xrightarrow[N \rightarrow \infty]{a.s.} p_{i,j} \quad (4)$$

## 1.2 Quantifying the efficiency of the classifying procedure

**Definition 1.** The empirical Matthews Correlation Coefficient (MCC) metric is defined by:

$$\widehat{MCC} = \frac{N \times \sum_{k=0}^{K-1} \hat{c}_{k,k} - \sum_{k=0}^{K-1} (\sum_{i=0}^{K-1} \hat{c}_{i,k} \times \sum_{j=0}^{K-1} \hat{c}_{k,j})}{\sqrt{N^2 - \sum_{k=0}^{K-1} (\sum_{i=0}^{K-1} \hat{c}_{i,k})^2} \times \sqrt{N^2 - \sum_{k=0}^{K-1} (\sum_{j=0}^{K-1} \hat{c}_{k,j})^2}}. \quad (5)$$

and the true MCC is defined by

$$MCC_{true} = \frac{\sum_{k=0}^{K-1} p_{k,k} - \sum_{k=0}^{K-1} (\sum_{i=0}^{K-1} p_{i,k} \times \sum_{j=0}^{K-1} p_{k,j})}{\sqrt{1 - \sum_{k=0}^{K-1} (\sum_{i=0}^{K-1} p_{i,k})^2} \times \sqrt{1 - \sum_{k=0}^{K-1} (\sum_{j=0}^{K-1} p_{k,j})^2}}. \quad (6)$$

**Remark 2.** Note that by multiplying the numerator and denominator of (5) by  $\frac{1}{N^2}$ , we have

$$\widehat{MCC} = \frac{\sum_{k=0}^{K-1} \hat{p}_{k,k} - \sum_{k=0}^{K-1} (\sum_{i=0}^{K-1} \hat{p}_{i,k} \times \sum_{j=0}^{K-1} \hat{p}_{k,j})}{\sqrt{1 - \sum_{k=0}^{K-1} (\sum_{i=0}^{K-1} \hat{p}_{i,k})^2} \times \sqrt{1 - \sum_{k=0}^{K-1} (\sum_{j=0}^{K-1} \hat{p}_{k,j})^2}}. \quad (7)$$

Hence, by Equation (4)

$$\widehat{MCC} \xrightarrow[N \rightarrow \infty]{a.s.} MCC_{true}. \quad (8)$$

In practice, we only have access to the empirical value  $\widehat{MCC}$ . It is desirable to quantify how far  $\widehat{MCC}$  is from  $MCC_{true}$ . One classical way to answer this question is to provide a confidence interval for  $MCC_{true}$ . Moreover, if one wants to compare two different classification procedures, one can compute for each procedure the associated  $\widehat{MCC}_1$  and  $\widehat{MCC}_2$ , and investigate whether there is statistical evidence that:

$$\widehat{MCC}_1 \leq \widehat{MCC}_2 (resp. \geq) \implies MCC_{true1} \leq MCC_{true2} (resp. \geq).$$

This can be done thanks to a confidence interval for  $\widehat{MCC}_1 - \widehat{MCC}_2$  which is classically derived from a joint Central Limit Theorem for  $(\widehat{MCC}_1, \widehat{MCC}_2)$ .

### 1.2.1 Vectorial central limit theorem for $\widehat{MCC}$ and application to confidence interval

Let  $P_n$  be the square matrix of size  $K$ , where the variable at the column  $j$  and line  $i$  is  $X_n(i, j)$ . We obtain that

$$\widehat{P} = \frac{1}{N} \sum_{n=0}^{N-1} P_n. \quad (9)$$

Let  $\mathcal{M}_K$  be the space of all the square real matrices of size  $K$ , and  $g$  be the application defined by:

$$\begin{aligned} g &: \mathcal{M}_K \rightarrow \mathbb{R} \\ (x_{i,j}) &\mapsto g((x_{i,j})), \end{aligned}$$

where

$$g((x_{i,j})) = \frac{\sum_{k=0}^{K-1} x_{k,k} - \sum_{k=0}^{K-1} (\sum_{i=0}^{K-1} x_{i,k} \times \sum_{j=0}^{K-1} x_{k,j})}{\sqrt{1 - \sum_{k=0}^{K-1} (\sum_{i=0}^{K-1} x_{i,k})^2} \times \sqrt{1 - \sum_{k=0}^{K-1} (\sum_{j=0}^{K-1} x_{k,j})^2}}. \quad (10)$$

**Theorem 1.1.** *If Assumption 1 holds, then*

$$1. \quad \sqrt{N}((\widehat{MCC} - MCC_{true}) \xrightarrow[N \rightarrow \infty]{\mathcal{L}} \mathcal{N}_1(0, \sigma_1), \quad (11)$$

where  $\sigma_1 = \sqrt{Dg^t \Sigma Dg}$ , and  $\Sigma$  is the covariance matrix of size  $K^2$

$$\Sigma = \begin{bmatrix} \text{Cov}(X(0,0), X(0,0)) & \dots & \text{Cov}(X(0,0), X(K-1, K-1)) \\ \vdots & \ddots & \vdots \\ \text{Cov}(X(K-1, K-1), X(0,0)) & \dots & \text{Cov}(X(K-1, K-1), X(K-1, K-1)) \end{bmatrix},$$

and  $Dg = (\frac{\partial g}{\partial x_{i,j}})_{(i,j) \in \{0, K-1\}^2}$  is the gradient at the coordinates  $\widehat{P}$  of the application  $g$ .

2. Let  $0 \leq \alpha \leq 1$  and  $\widehat{\sigma}_1$  a consistent estimator of  $\sigma_1$ , then

$$\lim_{N \rightarrow \infty} \mathbb{P} \left( \widehat{MCC} - \frac{q_\alpha \times \widehat{\sigma}_1}{\sqrt{N}} \leq MCC_{true} \leq \widehat{MCC} + \frac{q_\alpha \times \widehat{\sigma}_1}{\sqrt{N}} \right) = 1 - \alpha \quad (12)$$

where  $q_\alpha$  is such that  $\mathbb{P}(-q_\alpha \leq \mathcal{N}(0, 1) \leq q_\alpha) = 1 - \alpha$ .

**Remark 3.** In particular, the confidence interval with a 95% confidence level is given by

$$]\widehat{MCC} - \frac{1,96 \times \widehat{\sigma}_1}{\sqrt{N}}, \widehat{MCC} + \frac{1,96 \times \widehat{\sigma}_1}{\sqrt{N}}[. \quad (13)$$

**Remark 4.** Closed formula for  $Dg$  and  $\widehat{\Sigma}$  provided in the Appendix.

**Proof 1.** 1. According to the vectorial central limit theorem, we have

$$\sqrt{N} \left( \frac{1}{N} \sum_{n=0}^{N-1} (P_n - E[P_n]) \right) \xrightarrow[N \rightarrow \infty]{\mathcal{L}} \mathcal{N}_{K^2}(\mathbf{0}, \Sigma)$$

Now setting  $\sigma_1 = \sqrt{Dg^t \Sigma Dg}$ , the Delta method ensures

$$\sqrt{N} \left( (g(\widehat{P}) - g\left(\frac{1}{N} \sum_{n=0}^{N-1} E[P_n]\right)) \right) \xrightarrow[N \rightarrow \infty]{\mathcal{L}} \mathcal{N}_1(0, \sigma_1^2)$$

2. According to the Slutsky Lemma

$$\frac{\sqrt{N} \left( (g(\widehat{P}) - g\left(\frac{1}{N} \sum_{n=0}^{N-1} E[P_n]\right)) \right)}{\widehat{\sigma}_1} \xrightarrow[N \rightarrow \infty]{\mathcal{L}} \mathcal{N}_1(0, 1)$$

where,

$$\widehat{\sigma}_1 = \sqrt{Dg^t \widehat{\Sigma} Dg} \quad (14)$$

and  $\widehat{\Sigma}$  any consistant estimator of  $\Sigma$ .

### 1.2.2 Application to statistical test

In this Section, we aim to provide statistical evidence that two models' performance differ significantly. To do so, we test  $H_0 : MCC_{true1} = MCC_{true2}$  against  $H_1 : MCC_{true1} \neq MCC_{true2}$ , where  $MCC_{true1}$  is the true  $MCC$  value for model 1, and  $MCC_{true2}$  is the  $MCC$  value for model 2.

Let  $X_1(i, j), \dots, X_n(i, j)$  be i.i.d variables and of the same law as  $X(i, j)$ . Let  $P_n$  be the square matrix of size  $K$ , where the variable at the column  $j$  and line  $i$  is  $X_n(i, j)$ .

Let  $Y_1(i, j), \dots, Y_n(i, j)$  be i.i.d variables and of the same law as  $Y(i, j)$ . Let  $Q_n$  be the square matrix of size  $K$ , where the variable at the column  $j$  and line  $i$  is  $Y_n(i, j)$ .

Let  $U_n$  be the vector of such that  $U_n$  is the juxtaposition of  $P_n$  and  $Q_n$ . Let  $\bar{U}_N$  be defined by:

$$\bar{U}_N = \frac{1}{N} \sum_{n=0}^{N-1} U_n. \quad (15)$$

We define the functions  $J$  and  $f$  by

$$\begin{aligned} J &: M_K \times M_K \longrightarrow \mathbb{R}^2 \\ &\quad (x, y) \longmapsto (g(x), g(y)). \\ f &: \mathbb{R}^2 \longrightarrow \mathbb{R} \\ &\quad (x, y) \longmapsto x - y. \end{aligned} \quad (16)$$

**Theorem 1.2.** Under  $H_0$ ,

$$\sqrt{N}(\widehat{MCC}_1 - \widehat{MCC}_2) \xrightarrow[N \rightarrow \infty]{\mathcal{L}} \mathcal{N}(0, \sigma_2^2). \quad (17)$$

where

$$\sigma_2 = \sqrt{Df^t \Sigma_b Df}, \quad (18)$$

$Df$  is the gradient of the application  $f$ , and  $\Sigma_b = DJ^t \Sigma_a DJ$  with  $DJ$  the gradient of the application  $J$ , and  $\Sigma_a = \text{Cov}(U_n)$  is a covariance matrix of size  $2K^2$ .

**Remark 5.** Hence, we will reject  $H_0$  as soon as  $|\widehat{MCC}_1 - \widehat{MCC}_2| > q_\alpha$ . The threshold  $q_\alpha$  is qualified thanks to Theorem 1.2 and the Slutsky Lemma. For example the threshold for a test of level  $\alpha = 5\%$  is given by  $\frac{1.96\sigma_2}{\sqrt{N}}$ .

**Remark 6.** Note that the framework developed in Section 1 can be applied on any of the classical metrics such as precision, recall, or f1 score.

**Remark 7.** Closed formula for  $DJ$  and  $\Sigma_a$  is in the Appendix.

**Proof 2.** According to the vectorial central limit theorem

$$\sqrt{N} \left( \frac{1}{N} \sum_{n=0}^{N-1} (U_n - E[U_n]) \right) \xrightarrow[N \rightarrow \infty]{\mathcal{L}} \mathcal{N}_{2K^2}(\mathbf{0}, \Sigma_a),$$

where  $\Sigma_a = \text{Cov}(U_n)$  is a covariance matrix of size  $2K^2$ . According to the delta method,

$$\sqrt{N} \left( (J(\bar{U}_N) - J\left(\frac{1}{N} \sum_{n=0}^{N-1} E[U_n]\right)) \right) \xrightarrow[N \rightarrow \infty]{\mathcal{L}} \mathcal{N}_2(\mathbf{0}, \Sigma_b).$$

where  $\Sigma_b = DJ^t \Sigma_a DJ$ . Now since  $J(\bar{U}_N) = (\widehat{MCC}_1, \widehat{MCC}_2)$  we have

$$\sqrt{N} \left( \begin{bmatrix} \widehat{MCC}_1 \\ \widehat{MCC}_2 \end{bmatrix} - \begin{bmatrix} MCC_{1true} \\ MCC_{2true} \end{bmatrix} \right) \xrightarrow[N \rightarrow \infty]{L} \mathcal{N}_2(\mathbf{0}, \Sigma_b).$$

Applying again the delta method, we get

$$\sqrt{N}((\widehat{MCC}_1 - \widehat{MCC}_2) - (MCC_{1true} - MCC_{2true})) \xrightarrow[N \rightarrow \infty]{\mathcal{L}} \mathcal{N}(0, \sigma_2^2).$$

where  $\sigma_2 = \sqrt{Df^t \Sigma_b Df}$ , with  $Df$  the gradient of the application  $f$ .  
Under  $H_0$ , we have

$$\sqrt{N}(\widehat{MCC}_1 - \widehat{MCC}_2) \xrightarrow[N \rightarrow \infty]{\mathcal{L}} \mathcal{N}(0, \sigma_2^2).$$

## APPENDIX:

### Calculating $\widehat{\Sigma}$

For elements in the diagonal of  $\Sigma$ , we have:

$$\begin{aligned} Cov(X_{l_1, m_1}, X_{l_1, m_1}) &= E(X_{l_1, m_1}^2) - E(X_{l_1, m_1})^2 \\ &= p_{l_1, m_1} \times (1 - p_{l_1, m_1}). \end{aligned} \quad (1)$$

We obtain that a consistent estimation for  $\widehat{\Sigma}$  is:  $\widehat{p}_{l_1, m_1} \times (1 - \widehat{p}_{l_1, m_1})$ .

For elements outside the diagonal, we obtain that:

$$\begin{aligned} Cov(X_{l_1, m_1}, X_{l_2, m_2}) &= E(X_{l_1, m_1} \times X_{l_2, m_2}) - E(X_{l_1, m_1}) \times E(X_{l_2, m_2}) \\ &= -p_{l_1, m_1} * p_{l_2, m_2}. \end{aligned} \quad (2)$$

We obtain that a consistent estimation for  $\widehat{\Sigma}$  is:  $-\widehat{p}_{l_1, m_1} * \widehat{p}_{l_2, m_2}$ .

### Calculating $Dg$

We introduce the following notation for the purpose of clarity in our calculations: Let  $\widehat{p}_{i, \cdot}$  designates the sum of the elements of row  $i$  of  $\widehat{P}$ .

Let  $\widehat{p}_{\cdot, j}$  designates the sum of the elements of column  $j$  of  $\widehat{P}$ .

Let  $\widehat{p}_{i, -[j_0, \dots, j_A]}$  with  $A \in [0, K-1]$  designates  $\widehat{p}_{i, \cdot} - \sum_{a=0}^A \widehat{p}_{i, j_a}$

Let  $\widehat{p}_{-[i_0, \dots, i_A], j}$  with  $A \in [0, K-1]$  designates  $\widehat{p}_{\cdot, j} - \sum_{a=0}^A \widehat{p}_{i_a, j}$

Let  $Tr(\widehat{p})$  designates the sum of the elements in the diagonal of  $\widehat{P}$ .

We must obtain  $\frac{\partial g}{\partial \widehat{p}_{i, j}}$ . We distinguish between the case where  $i = j$  and  $i \neq j$ .

**When  $i = j$ , we have:**

$$g(x_{l, l}) = \frac{x_{l, l} + a - (b + x_{l, l}^2 + x_{l, l} \times c)}{\sqrt{1 - d - (x_{l, l} + e)^2} \times \sqrt{1 - f - (x_{l, l} + g)^2}}. \quad (3)$$

Then we have:

$$\frac{\partial g}{\partial x_{l,l}} = \frac{(1 - 2 \times x_{l,l} - c) \times A \times B + ((x_{l,l} + e) \times \frac{B}{A} + (x_{l,l} + g) \times \frac{A}{B}) \times (x_{l,l} + a - (b + x_{l,l}^2 + x_{l,l} \times c))}{A^2 \times B^2}$$

with:

$$A = \sqrt{1 - d - (x_{l,l} + e)^2} \quad \text{and} \quad B = \sqrt{1 - f - (x_{l,l} + g)^2}.$$

When the input for  $g$  is our matrix  $\hat{P}$ , we have:

$$a = Tr(\hat{p}) - \hat{p}_{l,l}, \quad b = \sum_{k \neq l}^{K-1} (\hat{p}_{.,j} * \hat{p}_{i,.}) + \hat{p}_{-[l],l} \times \hat{p}_{l,-[l]}, \quad c = \hat{p}_{-[l],l} + \hat{p}_{l,-[l]}$$

$$d = \sum_{k \neq l}^{K-1} \hat{p}_{.,k}^2, \quad e = \hat{p}_{-[l],l}, \quad f = \sum_{k \neq l}^{K-1} \hat{p}_{k,.}^2$$

$$g = \hat{p}_{l,-[l]} \quad \text{and} \quad x_{l,l} = \hat{p}_{l,l}.$$

**When  $i \neq j$ , we have:**

$$g(x_{l,m}) = \frac{a_1 - (b_1 + (x_{l,m} + \hat{c}_1) \times d_1 + (x_{l,m} + e_1) \times f_1)}{\sqrt{1 - g_1 - (x_{l,m} + h_1)^2} \times \sqrt{1 - i_1 - (x_{l,m} + j_1)^2}}, \quad (4)$$

then we have:

$$\frac{\partial g}{\partial x_{l,m}} = \frac{-(d_1 + f_1)A_1B_1 + ((x_{l,m} + h_1)B_1/A_1 + (x_{l,m} + j_1)A_1/B_1)(a_1 - (b_1 + (x_{l,m} + \hat{c}_1)d_1 + (x_{l,m} + e_1)f_1))}{A_1^2B_1^2}$$

with:

$$A_1 = \sqrt{1 - g_1 - (x_{l,m} + h_1)^2} \quad \text{and} \quad B_1 = \sqrt{1 - i_1 - (x_{l,m} + j_1)^2}.$$

When the input for  $g$  is our matrix  $\hat{P}$ , we have:

$$a_1 = Tr(\hat{p}), \quad b_1 = \sum_{k \neq (l,m)}^{K-1} (\hat{p}_{.,k} * \hat{p}_{k,.}), \quad c_1 = \hat{p}_{l,-[m]}$$

$$d_1 = \hat{p}_{.,l}, \quad e_1 = \hat{p}_{-[l],m}, \quad f_1 = \hat{p}_{m,.}$$

$$g_1 = \sum_{k \neq m}^{K-1} \hat{p}_{.,k}^2, \quad h_1 = \hat{p}_{-[l],m}, \quad i_1 = \sum_{k \neq l}^{K-1} \hat{p}_{k,.}^2$$

$$j_1 = \hat{p}_{l,-[m]} \quad \text{and} \quad x_{l,m} = \hat{p}_{l,m}.$$

calculating  $\widehat{\Sigma}_a$

We have 6 cases:

- $Cov(X_{l_1, m_1}, X_{l_2, m_2})$
- $Cov(X_{l_1, m_1}, X_{l_1, m_1})$
- $Cov(Y_{l_1, m_1}, Y_{l_2, m_2})$
- $Cov(Y_{l_1, m_1}, Y_{l_1, m_1})$
- $Cov(X_{l_1, m_1}, Y_{l_1, m_1})$
- $Cov(X_{l_1, m_1}, Y_{l_2, m_2})$

with  $(l_1, m_1) \neq (l_2, m_2)$ .

The four first cases are already covered by our previous work on confidence intervals.

For the two next cases, we obtain that:

$$Cov(X_{l_1, m_1}, Y_{l_1, m_1}) = E(X_{l_1, m_1} \times Y_{l_1, m_1}) - E(X_{l_1, m_1}) \times E(Y_{l_1, m_1}) \quad (5)$$

We obtain that a consistent estimation for  $\widehat{\Sigma}_a$  is:

$$\frac{\sum_{n=0}^{N-1} X_{n(l_1, m_1)} \times Y_{n(l_1, m_1)}}{N} - \widehat{p}_{l_1, m_1} \times \widehat{q}_{l_1, m_1}$$

$$Cov(X_{l_1, m_1}, Y_{l_2, m_2}) = E(X_{l_1, m_1} \times Y_{l_2, m_2}) - E(X_{l_1, m_1}) \times E(Y_{l_2, m_2}) \quad (6)$$

We obtain that a consistent estimation for  $\widehat{\Sigma}_a$  is:

$$\frac{\sum_{n=0}^{N-1} X_{n(l_1, m_1)} \times Y_{n(l_2, m_2)}}{N} - \widehat{p}_{l_1, m_1} \times \widehat{q}_{l_2, m_2}$$

Notice that when  $X_n(i1, j1) = 1$ , it means that  $j1$  is the true label for the  $n^{th}$  text. As such,  $Y_n(i2, j2) = 0$  when  $j1 \neq j2$ . This means that for cases where  $j1 \neq j2$ , a consistent estimation for  $\widehat{\Sigma}_a$  is:

$$-\widehat{p}_{l_1, m_1} \times \widehat{q}_{l_2, m_2}$$

### Calculating $DJ$

We obtain:

$$\frac{\partial DJ_1(x, y)}{\partial y} = \frac{\partial g(x)}{\partial y} = 0, \quad \frac{\partial DJ_2(x, y)}{\partial x} = \frac{\partial g(y)}{\partial x} = 0$$
